# Supplementary material for: Real-Time Sensing of O-Phenylenediamine Oxidation on Gold Nanoparticles
Source: MDPI journal article supplement (doi:10.3390/s17030530), 2017-03-07
Supplement: s1 [file s1]

# Supporting Information

## **Real-time sensing of o-phenylenediamine oxidation on gold nanoparticles**

*Ru-Jia Yu<sup>1</sup>, Jia-Jia Sun<sup>1</sup>, Heng Song<sup>1</sup>, Jing-Zhi Tian<sup>2</sup>, Da-Wei Li<sup>1\*</sup>, and Yi-Tao Long<sup>1</sup>*

<sup>1</sup> Key laboratory for Advanced Materials, Shanghai Key Laboratory of Functional Materials Chemistry, & College of Chemistry and Molecular Engineering, East China University of Science and Technology, 130 Meilong Road, Shanghai, 200237, P. R. China

<sup>2</sup> College of Chemistry and Chemical Engineering, Qiqihar University, 42 Culture Road, Qiqihar, 161006, P. R. China

\* To whom correspondence should be addressed. E-mail: daweili@ecust.edu.cn; Tel/Fax: +086-21-6425-0032.

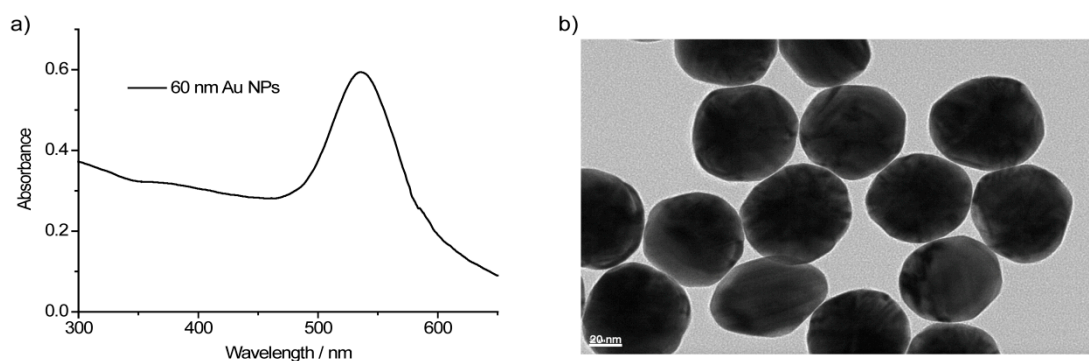

**Figure S1.** UV-Vis spectra (a) and transmission electron microscope image (b) of the synthesized gold nanoparticles with a diameter of 60 nm.

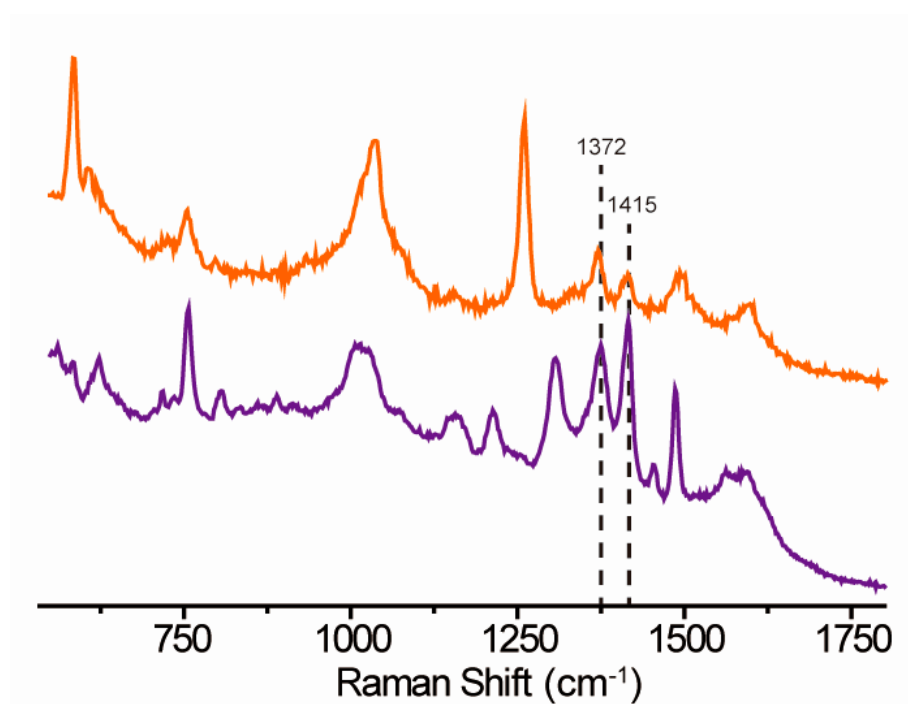

**Figure S2.** SERS spectra of pure 2,3-diaminophenazine solution (purple) and AuNPs/OPD+ $\text{Cu}^{2+}$  incubated at 37 °C for 30 min (orange).

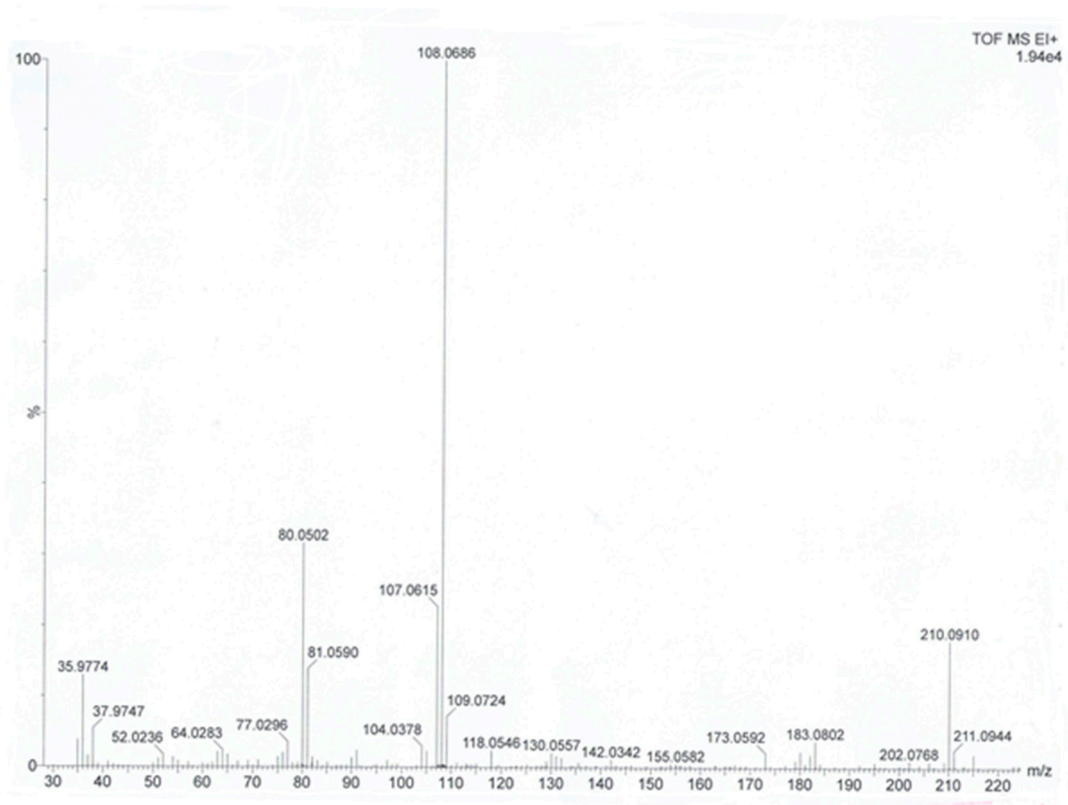

**Figure S3.** Mass spectrum (HREI<sup>+</sup>) of Au NPs/OPD+Cu<sup>2+</sup> incubated at 37 °C for 30 min.

**Table S1.** SERS Spectral data of AuNPs/OPD before and after reaction with Cu<sup>2+</sup> and Raman spectral data calculated with DFT for OPD and OPDox corresponding band assignments.

| OPD                           |                                     |                                                                 | OPDox                         |                                     |                                                                 |
|-------------------------------|-------------------------------------|-----------------------------------------------------------------|-------------------------------|-------------------------------------|-----------------------------------------------------------------|
| Theory<br>(cm <sup>-1</sup> ) | Experimental<br>(cm <sup>-1</sup> ) | Assignment                                                      | Theory<br>(cm <sup>-1</sup> ) | Experimental<br>(cm <sup>-1</sup> ) | Assignment                                                      |
| 592                           | 585                                 | $\rho$ CCC ring                                                 | 586                           | 585                                 | $\rho$ CCC ring                                                 |
| 760                           | 753                                 | $\nu$ CC ring,<br>$\nu$ C-NH <sub>2</sub>                       | 752                           | 753                                 | $\nu$ CC ring,<br>$\nu$ C-NH <sub>2</sub>                       |
| 1055                          | 1037                                | $\nu$ CC ring,<br>$\delta$ CCH ring                             | 1034                          | 1037                                | $\nu$ CC ring,<br>$\delta$ CCH ring                             |
| 1257                          | 1262                                | $\delta$ CCH ring,<br>$\nu$ CC ring,<br>$\nu$ C-NH <sub>2</sub> | 1262                          | 1262                                | $\delta$ CCH ring,<br>$\nu$ CC ring,<br>$\nu$ C-NH <sub>2</sub> |
| 1512                          | 1500                                | $\nu$ CCC ring,<br>$\delta$ CCH ring,                           | 1372                          | 1372                                | $\nu$ C-N=C,<br>$\nu$ CC ring                                   |

|      |      |                                                                 |      |      |                                                                                              |
|------|------|-----------------------------------------------------------------|------|------|----------------------------------------------------------------------------------------------|
|      |      | $\nu$ C-NH <sub>2</sub> ,<br>$\rho$ NH <sub>2</sub>             |      |      |                                                                                              |
| 1592 | 1600 | $\nu$ CCC ring,<br>$\delta$ CCH ring,<br>$\rho$ NH <sub>2</sub> | 1413 | 1415 | $\delta$ C-N=C                                                                               |
|      |      |                                                                 | 1499 | 1500 | $\nu$ CCC ring,<br>$\delta$ CCH ring,<br>$\nu$ C-NH <sub>2</sub> ,<br>$\rho$ NH <sub>2</sub> |
|      |      |                                                                 | 1601 | 1600 | $\nu$ CCC ring,<br>$\delta$ CCH ring,<br>$\rho$ NH <sub>2</sub>                              |

---

$\nu$ , stretching;  $\delta$ , in-plane bending;  $\rho$ , scissoring
